# Supplementary material
Source: PubMed Central journal article supplement (PMC2804168)
Supplement: supp_M109.041640_jbc.M109.041640-1.pdf [file supp_M109.041640_jbc.M109.041640-1.pdf]

Supplemental Fig. 1. Cellular localization of the transcription factors p50 and C/EBP $\beta$ . **A.** An ELISA based method, utilizing isolated nuclei, was used to demonstrate the nuclear translocation of the NF- $\kappa$ B p50 subunit following microbial stimulus. Both *C. parvum* infection and LPS treatment induced the nuclear translocation of p50 within one hour. The nuclear localization of p50 was also detected six hours after microbial stimulus. **B.** An ELISA-based C/EBP $\beta$  consensus sequence DNA binding assay was also performed on isolated nuclei from control uninfected and microbial-stimulated H69 cells. Isolated nuclei from total liver were used as the positive control. Cholangiocyte C/EBP $\beta$  could interact with the C/EBP $\beta$  consensus sequence in all conditions tested. **C.** Immunofluorescence was utilized to define the cellular localization of C/EBP $\beta$  in uninfected or microbial stimulated culture H69 cells. C/EBP $\beta$  was confined to the nucleus in both control, uninfected and in microbe-stimulated cholangiocytes. Data are represented as mean +/- SEM.

Supplemental Table 1. List of primers used for PCR-based approaches. Underlined sequences in the “Forward Primer” column correspond to inserted XhoI restriction endonuclease sites, while the underlined sequences in the “Reverse Primer” column correspond to inserted BglII restriction endonuclease sites used for subsequent cloning into the pGL4.22 Luciferase vector.

**A****p50 nuclear translocation**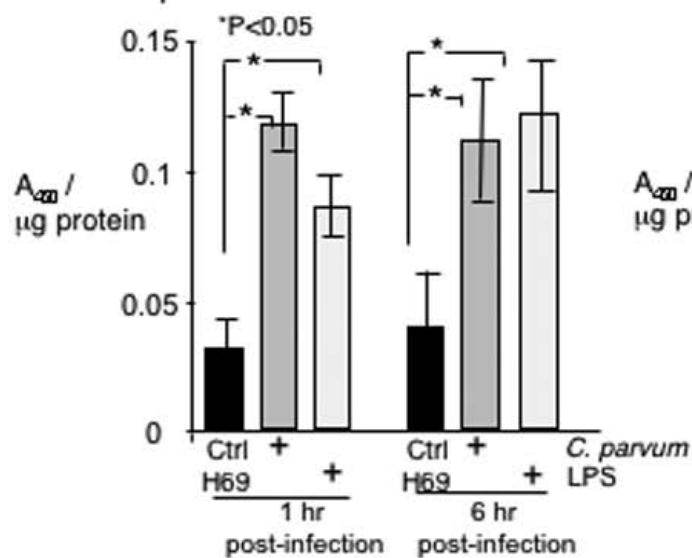**B****C/EBPβ binding assay**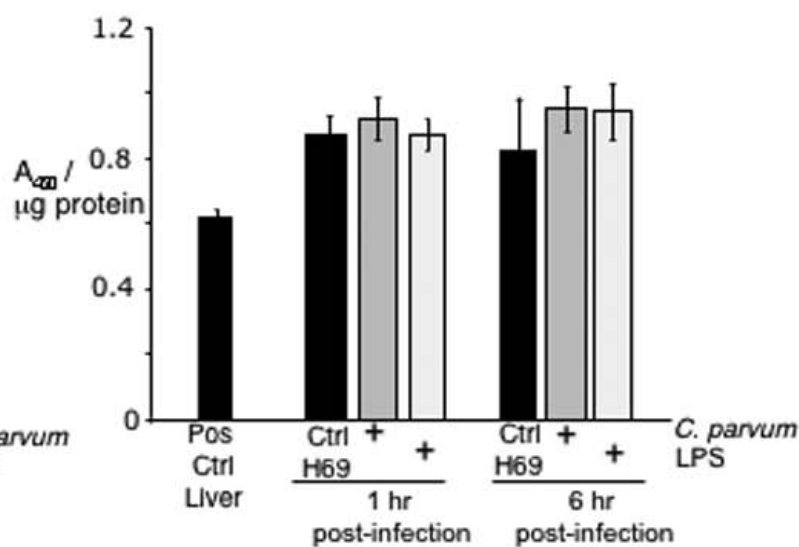**C**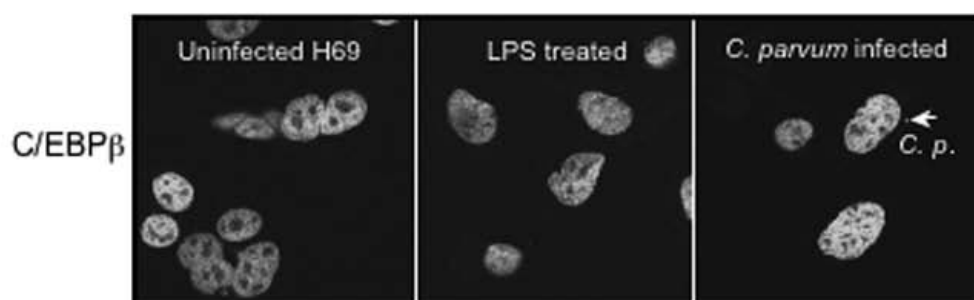

Table 1. List of primers.

| <b>Method</b>                       | <b>Forward Primer</b>                      | <b>Reverse Primer</b>                      |
|-------------------------------------|--------------------------------------------|--------------------------------------------|
| <b><u>Let-7i Race PCR</u></b>       |                                            |                                            |
| <b>5' RACE</b>                      |                                            |                                            |
| Gene Specific Primer                | 5'-TAGCAAGGCAGTAGCTTGCAGTGA                | Supplied by manufacturer                   |
| Nested                              | 5'-ATCTCCACAGCGGGCAATGTCACAA               | Supplied by manufacturer                   |
| <b>3' RACE</b>                      |                                            |                                            |
| Gene Specific Primer                | 5'-CTGGCTGAGGTAGTAGTTTGTGCTGTT             | Supplied by manufacturer                   |
| Nested                              | 5'-TTGTGACATTGCCCGCTGTGGAGAT               | Supplied by manufacturer                   |
| <b><u>RT-PCR</u></b>                |                                            |                                            |
| PPM1H                               | 5'-TGAAGCCTTAAGCAGTGGAAA                   | 5'-TGTGGAAGGAAAACCAGTGAC                   |
| MON2                                | 5'-TGACTGGCCATCTACTTGAGAA                  | 5'-GATCATTCTGATTGCTCCCA                    |
| C12ORF61                            | 5'-AGCTCTACAGGAGGCGAAAAC                   | 5'-CCTCTTTCAGGGCTGATTTCT                   |
| <b><u>Let-7i promoter ChIP</u></b>  | 5'-CGTTTTTCGCCTCCTGTAGAGC                  | 5'-CGCCAAACAGCAGCCAAGGCA                   |
| <b><u>Luciferase Constructs</u></b> |                                            |                                            |
| Full-length (-2461)                 | 5'-CCGCTCGAGCGCAGTCAATGAGCAGTGAGGG         | 5'-GGAAGATCTAGCAAAGCGGCTCCGGCG             |
| Δ1(-1991)                           | 5'-CCGCTCGAGAATATGTCAGGCAGGCTGAT           | 5'-GGAAGATCTAGCAAAGCGGCTCCGGCG             |
| Δ2(-1767)                           | 5'-CCGCTCGAGTCTTACTTTGCCAGAAAGGGAAT        | 5'-GGAAGATCTAGCAAAGCGGCTCCGGCG             |
| Δ3(-1167)                           | 5'-CCGCTCGAGCTGTTGGGAAAGGAGGTGCC           | 5'-GGAAGATCTAGCAAAGCGGCTCCGGCG             |
| Δ4(-1110)                           | 5'-CCGCTCGAGCTTAGGCGGCGATATGCG             | 5'-GGAAGATCTAGCAAAGCGGCTCCGGCG             |
| Δ5(-961)                            | 5'-CCGCTCGAGCTGATTTCTGGTAGCACGCTGA         | 5'-GGAAGATCTAGCAAAGCGGCTCCGGCG             |
| <b><u>Luciferase Mutants</u></b>    |                                            |                                            |
| Δ1M-1**                             |                                            |                                            |
| Distal                              | 5'-CCGCTCGAGAATATGTCAGGCAGGCTGAT           | 5'CCACCCGTTCCCCAGCACCTTCAGCTCTACAGGAGGCGA  |
| Proximal                            | 5'TCGCCTCCTGTAGAGCTGAAGGGTGCTGGGGAACGGGTGG | 5'-GGAAGATCTAGCAAAGCGGCTCCGGCG             |
| Δ1M-2**                             |                                            |                                            |
| Distal                              | 5'-CCGCTCGAGAATATGTCAGGCAGGCTGAT           | 5'-CAGCAGCCAAGGCATAGCAGGCCACCCGTTCCCCAGCAC |
| Proximal                            | 5'-GGTGCTGGGGAACGGGTGGCCTGCTATGCCTTGCTGCTG | 5'-GGAAGATCTAGCAAAGCGGCTCCGGCG             |

\*\* Distal and proximal amplicons were used as promoter and template to generate final mutant promoters
